1 The role of telomere shortening in carcinogenesis: A hybrid  
2 stochastic-deterministic approach  
3

4 Ignacio A. Rodriguez-Brenes<sup>1,2,\*</sup>, Natalia L. Komarova<sup>1,2</sup>, and Dominik Wodarz<sup>2,1</sup>

5 <sup>1</sup>Department of Mathematics, University of California, Irvine, California, United States of  
6 America.

7 <sup>2</sup>Department of Ecology and Evolutionary Biology, University of California, Irvine, Califor-  
8 nia, United States of America.

9 \*Corresponding author.

10 Email: iarodrig@uci.edu (IR)

## 11 **Abstract**

12 Genome instability is a characteristic of most cancers, contributing to the acquisition of ge-  
13 netic alterations that drive tumor progression. One important source of genome instability is  
14 linked to telomere dysfunction in cells with critically short telomeres that lack p53-mediated  
15 surveillance of genomic integrity. Here we research the probability that cancer emerges  
16 through an evolutionary pathway that includes a telomere-induced phase of genome insta-  
17 bility. To implement our models we use a hybrid stochastic-deterministic approach, which  
18 allows us to perform large numbers of simulations using biologically realistic population sizes  
19 and mutation rates, circumventing the traditional limitations of fully stochastic algorithms.  
20 The hybrid methodology should be easily adaptable to a wide range of evolutionary prob-  
21 lems. In particular, we model telomere shortening and the acquisition of two mutations:  
22 Telomerase activation and p53 inactivation. We find that the death rate of unstable cells,  
23 and the number of cell divisions that p53 mutants can sustain beyond the normal senes-  
24 cence setpoint determine the likelihood that the first double mutant originates in a cell with  
25 telomere-induced instability. The model has applications to an influential telomerase-null  
26 mouse model and p16 silenced human cells. We end by discussing algorithmic performance  
27 and a measure for the accuracy of the hybrid approximation.

## 28 **Introduction**

29 Cancer is driven by a process of clonal evolution, which involves the sequential accumulation  
30 of mutations that ultimately allow for uncontrolled cell proliferation [1, 2]. Often, tumors  
31 develop different types of genome instability, which impact the tumor’s ability to evolve and  
32 progress. One important source of genome instability is telomere dysfunction [3]. While  
33 mathematical modeling has significantly advanced our understanding of tumor evolution  
34 [4], the role of telomere shortening in connection to genome instability and carcinogenesis  
35 remains poorly understood from a quantitative perspective.

36 A serious obstacle in modeling tumor evolution in general, is that traditional fully stochas-  
37 tic algorithms, such as Gillespie’s method [5], are ill-equipped to deal with population sizes  
38 that are biologically relevant to the study of tumorigenesis at the scale of cell populations.  
39 Moreover, the low mutation rates of mammalian cells require a very large number of sim-  
40 ulations to obtain statistically meaningful results on mutant dynamics. As a consequence,  
41 too often models are constructed and analyzed with population sizes that are unrealistically  
42 small and mutation rates that are unrealistically large. This is especially problematic when  
43 trying to compare model results to emerging clinical data. Here we draw on ideas related  
44 to the development of hybrid stochastic-deterministic methods to circumvent the aforemen-  
45 tioned limitations of fully stochastic approaches. In particular, we outline an efficient hybrid  
46 stochastic-deterministic algorithm that allows for the use of realistic population sizes and  
47 mutation rates. This algorithm should be easily adaptable to a wide range of applications  
48 in the field of evolution.

49 In this article, we develop a mathematical model that takes into account the effects of  
50 telomere shortening in a clonal cell population. It examines the relative likelihood and fre-  
51 quency of the order of acquisition of the two crucial mutations in carcinogenesis, telomerase  
52 activation and p53 inactivation, as a function of key biological parameters. We also present  
53 results on the probability that the first double mutant originates in a cell with genome in-  
54 stability caused by telomere dysfunction. This probability is particularly important because  
55 cells that undergo telomere-induced genome instability typically acquire a large number of  
56 genome abnormalities associated with cancer [6], which suggests that an evolutionary path-  
57 way that includes transient telomere deficiency can facilitate malignant progression [3]. To  
58 implement the model we used the hybrid stochastic-deterministic algorithm. We also discuss  
59 a measure for the accuracy of the hybrid approximation, and compare algorithmic perfor-  
60 mance to a fully stochastic implementation of the model.

## 61 **Telomeres and telomere crisis**

62 Telomeres are repetitive sequences of DNA found at the ends of linear chromosomes. They  
63 play a protective role by hiding the chromosome ends from the DNA damage response  
64 machinery. In cells that lack telomere maintenance pathways telomere length shortens with  
65 each cell division. If cell cycle checkpoints are intact, critically short telomeres halt cell  
66 proliferation, inducing either a terminal state of arrest called cellular senescence, or apoptosis  
67 [6]. Thus, normal cells that lack telomere maintenance pathways are only capable of a  
68 limited number of divisions, a phenomenon known as Hayflick’s limit [7]. Telomerase is  
69 a ribonucleoprotein enzyme that extends telomere length. It is composed of a catalytic  
70 component that includes the protein TERT, and the RNA component TERC. Cells that  
71 express telomerase at sufficient levels offset the telomere shortening that occurs during cell  
72 division, which allows them to bypass replicative limits and divide indefinitely [3]. Since most  
73 mutations occur during cell division, replicative limits protect against cancer, by limiting the  
74 sequential accumulation of mutations and the clonal expansion of cells.

75 Failure of cells with critically short telomeres to undergo senescence can result in telomere  
76 crisis. During crisis continued telomere shortening leads to telomere dysfunction increasing  
77 the chance of non-homologous end joining (NHEJ) and the fusion of one dysfunctional telomere  
78 to another. Cells with fused telomeres become dicentric, which leads to breakage–fusion–  
79 bridge cycles, and high levels of genome instability and cell death [3]. Genome instability  
80 in cells undergoing crisis can give rise to chromosome gains and losses, gene amplifications  
81 and deletions, and non-reciprocal translocations amongst other types of genomic alterations.  
82 The rare cells that escapes crisis, usually through telomerase activation, typically harbor  
83 a large number of genomic abnormalities associated with cancer [6]. It has thus been sug-  
84 gested that the passage and emergence from crisis can be an important contributor to tumor  
85 development in some cancers [8].

86 In this article we use mathematical models to study the emergence and population dy-  
87 namics of cells with two types of mutations: loss of p53 function and telomerase activation.

88 Inactivation of p53 is a frequent event in tumorigenesis [9]. And in particular, inactivation  
89 of the p53 pathway is necessary to bypass telomere-induced senescence [10]. In the paper we  
90 focus on the first emergence of a double mutant and in the order of acquisition of the two  
91 mutations. We model the effects of telomere crisis by assuming an elevated death rate for  
92 unstable (in crisis) cells. The order of mutations is important, because cells that undergo  
93 crisis can acquire a number of important genomic changes, which occur during the period of  
94 genome instability caused by telomere dysfunction.

95 Our model has a direct application to the important  $TERC^{-/-}$  mouse model. Mouse cells  
96 have very long telomeres and express telomerase promiscuously; as a consequence telomere  
97 shortening is not a barrier to tumor progression in mice [11]. To test the function of telom-  
98 erase in tissue biology a telomerase-knockout mouse model was developed, by breeding mice  
99 that do not express  $TERC$  (the RNA component of telomerase). Continuous breeding of  
100  $TERC^{-/-}$  mice over successive generations led to the progressive shortening of telomeres  
101 [12]. A series of studies were then conducted in late generation  $TERC^{-/-}$  mice, in which a  
102 gene ( $Ink4a/Arf$ ) encoding for two distinct tumor suppressor proteins was deleted. Mice null  
103 for this gene develop sarcomas and lymphomas with short latency;  $TERC^{-/-}$  mice however,  
104 had reduced tumor incidence and increased latency, demonstrating that telomere shortening  
105 and lack of telomerase expression inhibits tumorigenesis in late generation  $TERC^{-/-}$  mice  
106 [13, 14].

107 Critically short mouse telomeres induce senescence by activating p53; and the loss of  
108 p53 function in mice is sufficient to bypass senescence [15]. Studies of  $TERC^{-/-}$   $p53^{+/-}$   
109 mutant mice also revealed that the  $p53^{+/-}$  phenotype is sufficient to abrogate the normal  
110 growth arrest that occurs in response to short telomeres [16]. Neoplastic lesions in these  
111 mice had a large number of genomic aberrations consistent with telomere dysfunction and  
112 the breakage–fusion–bridge cycles that occur during crisis.

113 Our model also has applications to human cells that lack p16 function. In humans,  
114 stem cells, germ cells, and the vast majority of cancer cells ( $\sim 90\%$ ) express telomerase,

115 whereas other cell types do not [17]. The critical component of telomerase that is missing  
116 in most human cells is the catalytic subunit TERT. Unlike murine cells, human cells can  
117 trigger senescence by activating the p53 or the p16/RB pathways [10]. Although there is  
118 also evidence that suggests that p16-induced senescence is not the direct consequence of  
119 telomere shortening [18]. Regardless, cells lacking p16 function may not be uncommon *in*  
120 *vivo* in humans, since epigenetic silencing of the p16 gene is commonly found in histologically  
121 normal human mammary epithelial cells (HMECs) [19]. Moreover, cell culture studies of  
122 HMECs repeatedly show that following the spontaneous silencing of p16, the rare cells that  
123 are able to bypass the p53 checkpoint undergo extended proliferation and eventually enter  
124 crisis [20, 21].

## 125 **Model description**

126 We consider four types of cells, which for notation purposes we call  $X, Y, Z$ , and  $W$ , see  
127 Figure 1A. At the base of the model we have  $X$  cells, which are telomerase negative (here  
128 noted as  $\text{tmase}^-$ ). Telomerase null cells correspond to  $\text{TERC}^{-/-}$  cells in the context of the  
129 mouse model previously described, or TERT negative cells in the context of human somatic  
130 cells.  $X$  cells have two functioning p53 alleles ( $\text{p53}^{+/+}$ ). These are proliferating cells at early  
131 possibly pre-neoplastic stages of tumor development. This characterization is consistent  
132 with the understanding that in certain tumors telomere crisis is a very early event. In breast  
133 cancer for example, telomere crisis is believed to occur during progression from usual ductal  
134 hyperplasia (UDH) to ductal carcinoma in situ (DCIS) [8]. Being telomerase negative,  $X$   
135 cells can divide only a limited number of times. To model replicative limits we assume  
136 that each cell has a replication capacity  $\rho \geq 0$ . When a cell with replication capacity  $\rho > 0$   
137 divides, it produces two daughter cells with replication capacities  $\rho - 1$ . Cells with replication  
138 capacity  $\rho = 0$  become senescent and stop dividing (Figure 1B). The maximum replication  
139 capacity in the model is denoted by  $\rho_m$ .

140  $Y$  cells are telomerase positive ( $\text{tmase}^+$ ) and  $\text{p53}^{+/+}$ . Telomerase expression allows them

141 to escape replicative limits, making them capable of dividing an unlimited number of times.  
142 In the model, a  $Y$  cell arises from a point mutation in an  $X$  cell. Recently, activating point  
143 mutations in the *tmase* promoter have been identified in multiple cancer types [22, 23, 24,  
144 25]. We consider mutations that occur during cell division and use the approximate point  
145 mutation rate in cancer  $\mu_2 = 10^{-9}$  [26].

146  $Z$  cells are  $p53^{+/-}$  and telomerase negative. In mice, single-copy loss of p53 is sufficient  
147 to affect the cell's ability to undergo senescence in response to critically short telomeres  
148 [16]. Direct confirmation that these same dynamics occur in humans is currently missing.  
149 However, there is strong evidence that the human p53 gene is haplo-insufficient in a wide  
150 variety of contexts [27]. Furthermore, 80% of the most common p53 mutants have been found  
151 to have the capacity to exert a dominant-negative effect over wild-type p53 [9]. Hence, in the  
152 model we assume that the  $p53^{+/-}$  phenotype allows cells to extend their replication capacity  
153 by  $\rho_e$  cell divisions beyond the point at which senescence occurs in normal cells. We call the  
154 parameter  $\rho_e$  the replication capacity extension. Early experiments, based on SV40-induced  
155 disruption of p53, suggest that the replication capacity extension is in the order of 20 PD  
156 [28], with a range of 20 to 30 PD being suggested [29]. The precise value of  $\rho_e$  however,  
157 is likely to vary *in vivo*; we thus treat it as a variable, and explore the effects of varying  
158  $\rho_e$  on the system. In the model,  $Z$  cells arise from  $X$  cells with a rate per cell generation  
159  $\mu_1 = 10^{-7}$  (a common estimate for the rate per cell division of inactivating one copy of a  
160 tumor suppressor gene [30]).

161  $W$  cells arise from  $Z$  cells that keep dividing past their extended replication capacity.  
162 As a consequence their telomeres continue to shorten, up to the point where they become  
163 dysfunctional, resulting in genome instability. Cells at this stage enter crisis, a phase charac-  
164 terized by non-homologous end joining, breakage–fusion–bridge cycles, and widespread cell  
165 death [3]. These dynamics are considered in the model by including a separate death rate,  
166  $D$ , for  $W$  cells.

167 Breast and colorectal cancer studies suggest that telomere crisis is an early event [8, 31].

168 In colorectal cancer, there is evidence of telomere dysfunction during the adenoma–early  
169 carcinoma transition [31]. Moreover, in a study of colorectal adenomas with average size 2  
170 mm (range 1–3 mm) 55% of adenomas showed evidence of chromosomal instability consistent  
171 with telomere dysfunction [32]. In breast cancer, crisis is believed to occur during the UDH  
172 to DCIS transition [8], and according to a standard diagnostic criterium, ductal hyperplasias  
173 should be less than 2 mm in diameter [33]. Avascular tumors can grow up to 2–3 mm  
174 in diameter [34]. Hence, these data suggest that telomere crisis might occur during the  
175 avascular phase of tumor development. Based on these observations we limit our study to  
176 events occurring during avascular growth.

177 If we use a 2–3 mm diameter for avascular tumors and the volume measurements for tumor  
178 cells reported in [35], we find that the maximum cell population of an avascular tumor ranges  
179 from  $3.6 \times 10^6 - 5.3 \times 10^7$  cells. In the article we choose the intermediate value,  $N = 10^7$ , for  
180 the maximum cell population size. To incorporate this limit in population size, we make the  
181 cell division rate dependent on cell density, controlled by the variable  $f$  in equation [1]. In  
182 equations [1–5], we define  $K = 10^7/(1 - d/r)$ , where  $r$  and  $d$  are respectively the cell division  
183 and cell death rate parameters. This definition of  $K$  ensures that the maximum population  
184 size is equal to  $10^7$ , irrespective of the magnitudes of  $r$  and  $d$ ; it is thus consistent with our  
185 understanding that maximum population size in avascular tumors is limited by factors such  
186 as nutrient accessibility, and not by the relative magnitudes of the cell division and cell death  
187 rates. Finally, we note that  $r$  and the cell death parameters,  $d$  and  $D$ , have arbitrary units  
188 of 1/time. We can then express the model in dimensionless units of time by setting  $r = 1$  in  
189 the simulations and expressing the values of  $d$  and  $D$  in relation to this value of  $r$ .

190 Double mutants can be generated through a  $p53^{+/-}$  mutation in a  $Y$  cell (with rate  $\mu_1$ )  
191 or through a  $tmase+$  mutation in a  $Z$  or  $W$  cell (with rate  $\mu_2$ ). In the this article we are  
192 interested in the first emergence of a double mutant, for this reason when the first double  
193 mutation occurs the simulations stop. The ordinary differential equation representation of  
194 the model, including *only single* mutations (either  $tmase+$  or  $p53^{+/-}$ ) is given by equations



195 [1-5]:

$$f = (1 - tot/K) \quad , \quad tot = Y + W + \sum_{j=0}^{\rho_m} X_j + \sum_{j=0}^{\rho_m + \rho_e} Z_j \quad (1)$$

$$\left\{ \begin{array}{l} \dot{X}_{\rho_m} = -rX_{\rho_m}f - dX_{\rho_m} \\ \dot{X}_{\rho_m-1} = 2rX_{\rho_m}f - rX_{\rho_m-1}f - dX_{\rho_m-1} - r(\mu_1 + \mu_2)X_{\rho_m}f \\ \dot{X}_{\rho_m-2} = 2rX_{\rho_m-1}f - rX_{\rho_m-2}f - dX_{\rho_m-2} - r(\mu_1 + \mu_2)X_{\rho_m-1}f \\ \vdots \\ \dot{X}_0 = 2rX_1f - dX_0 - r(\mu_1 + \mu_2)X_1f \end{array} \right. \quad (2)$$

$$\dot{Y} = rYf - dY + \mu_2 \sum_{j=1}^{\rho_m} rX_jf \quad (3)$$

$$\left\{ \begin{array}{l} \dot{Z}_{\rho_m + \rho_e} = -rZ_{\rho_m + \rho_e}f - dZ_{\rho_m + \rho_e} \\ \dot{Z}_{\rho_m + \rho_e - 1} = 2rZ_{\rho_m + \rho_e}f - rZ_{\rho_m + \rho_e - 1}f - dZ_{\rho_m + \rho_e - 1} + \mu_1 rX_{\rho_m}f \\ \vdots \\ \dot{Z}_{\rho_e} = 2rZ_{\rho_e + 1}f - rZ_{\rho_e}f - dZ_{\rho_e} + \mu_1 rX_1f \\ \dot{Z}_{\rho_e - 1} = 2rZ_{\rho_e}f - rZ_{\rho_e - 1}f - dZ_{\rho_e - 1} \\ \vdots \\ \dot{Z}_0 = 2rZ_1f - rZ_0f - dZ_0 \end{array} \right. \quad (4)$$

$$\dot{W} = rWf - DW + 2rZ_0f \quad (5)$$

196 In Eqs. [1–5] we assume that both offspring of a dividing cell cannot mutate simultane-  
197 ously, since the probability of such an event occurring is negligible [30].

## 198 **Hybrid method**

199 Studying evolutionary processes computationally requires the ability to simulate the dynam-  
200 ics of large and small populations simultaneously. Mutations are stochastic and rare, and  
201 at least transiently, very small mutant populations can coexist with a large number of wild  
202 type individuals. In such settings, tracking the stochastic fluctuations of the small mutant  
203 populations can be essential to determine the final outcomes of the system. A problem  
204 then arises trying to simulate a multi-scale system stochastically, given that in classical fully  
205 stochastic algorithms, such as Gillespie’s method, as the population size increases the aver-  
206 age time step decreases [5]. Recently, and especially in the field of Physical Chemistry, novel  
207 computational approaches have been developed (e.g. the Next Reaction Method and Tau-  
208 Leaping methods [36, 37]), which try to address these difficulties. There is also an important  
209 push in the development of hybrid stochastic-deterministic approaches [38, 39]. These ideas  
210 however, have not significantly penetrated the studies of population dynamics and evolution,  
211 presumably because they can rely on theoretical concepts (e.g. Langevin’s equation), which  
212 are not very common in these fields. Here, we present an application of these ideas to the  
213 field of evolution, by outlining a hybrid stochastic-deterministic algorithm for our model.

214 Intuitively, the implementation of the algorithm relies on two simple ideas: (i) mutations  
215 should be modeled stochastically; and (ii) if, a cell population is sufficiently large, an ODE  
216 representation can provide a good approximation of most stochastic trajectories of the popu-  
217 lation. With this idea in mind we begin with the system described in equations [1–5], which  
218 from now on we call the full system. We can write this system as a single vector equation  
219  $d\mathbf{V}/dt = \mathbf{F}(\mathbf{V})$ , where  $\mathbf{V}$  is a vector that contains all the different cell types. Let  $M > 0$  be  
220 a given threshold. We can classify the  $X$  population as small if  $\sum X_i < M$ , or as large oth-  
221 erwise, and use the same criteria to classify the other cell types ( $W, Y$  and  $Z$ ). At any given

222 time, let  $\mathbf{V}_l$  and  $\mathbf{V}_s$  be vectors containing the large and small cell populations. We can then  
223 define the reduced system  $d\mathbf{V}_l/dt = \mathbf{F}_l(\mathbf{V}_l)$  derived from the full system by: (1) Retaining  
224 only the equations for the large cell populations  $\mathbf{V}_l$ ; (2) keeping constant the contributions  
225 of the small populations  $\mathbf{V}_s$ ; and (3) eliminating the mutation terms from the equations. If  
226 the  $\mathbf{V}_l$  are sufficiently large, there will be a time interval  $(t, t + \tau)$ , where the deterministic  
227 solution of the reduced ODE will approximate the trajectories of the large populations in a  
228 stochastic implementation of the full system.

229 The events in the model are cell division, mutation, and death. In Gillespie's method,  
230 every event  $\nu$  has a given propensity  $a_\nu(\mathbf{V})$ . The time at which the next event  $\nu$  will occur  
231 is exponentially distributed with intensity  $a_\nu(\mathbf{V})$ . In the hybrid approach, cell division and  
232 death of large populations are modeled deterministically (using the reduced system), while  
233 cell division and death of small populations and all mutations are modeled stochastically, with  
234 propensities  $a_\nu(\mathbf{V}_s, \mathbf{V}_l(t))$  that now vary continuously with time. Hence, the next occurrence  
235 of a stochastic event  $\nu$  is a non-homogeneous Poisson process, with a time varying intensity  
236  $a_\nu(\mathbf{V}_s, \mathbf{V}_l(t))$ . In this case, if the system is updated up to a time  $t$  and  $r_\nu$  is a uniform  
237 random number in  $[0, 1)$ , we can set the time for the next  $\nu$  event as the solution,  $\tau_\nu$ , to the  
238 equation [39]:

$$\int_t^{t+\tau_\nu} a_\nu(\mathbf{V}_s, \mathbf{V}_l(s)) ds + \log(r_\nu) = 0 \quad (6)$$

239 It is well known that the stochastic formulation reduces to the deterministic formulation in  
240 the thermodynamic limit [40]. However, one important practical question is how large should  
241 the threshold  $M$  be to provide a satisfactory approximation in the implementation of the  
242 hybrid algorithm. In this article, we use a numerical criterion to determine this value. First,  
243 let  $G(t)$  stand for the total number of cells of any of the cell types as a function of time (i.e.  
244  $G(t) = \sum X_i(t), Y(t), \sum Z_i(t),$  or  $W(t)$ ). We can consider the function  $E[G^{(M)}(t)]$  equal to  
245 the expected number of  $G$  type cells using the hybrid method with the threshold  $M$ . The  $L^2$

246 norm (here denoted as  $\|\cdot\|$ ) is a measure for the distance between two functions. We can then  
247 define the normalized error  $\epsilon(M_1, M_2) = \|E[G^{(M_1)}(t)] - E[G^{(M_2)}(t)]\| / \|E[G^{(M_2)}(t)]\|$ , which  
248 provides a measure of the difference in the expected number of  $G$  cells using the two thresh-  
249 olds,  $M_1$  and  $M_2$ , during a specific time interval  $I$ . To determine an acceptable threshold  $M$ ,  
250 we define a tolerance  $tol$  and require that  $\epsilon(M, 2M) < tol$ . In the result section we discuss  
251 the accuracy of the approximation for the telomere model and improvements in the com-  
252 putational efficiency of the hybrid algorithm compared to a fully stochastic implementation  
253 (Figure 4 and Table 1).

## 254 Results

255 To study the effects of replicative limits and the emergence of double mutants ( $p53^{+/-}$  and  
256  $tmase+$ ), we implement the model using a hybrid stochastic-deterministic algorithm detailed  
257 in the previous section of the paper.

258 Figures 2A-C plot simulations showing the three possible outcomes of the model. All  
259 simulations start with a single  $X$  type cell ( $tmase-$ ,  $p53^{+/+}$ ) with replication capacity  $\rho_m = 50$   
260 (a commonly used value for human somatic cells [7]). Figure 2A depicts a simulation where a  
261 double mutation did not occur. In this panel the  $X$  population first rises to a value close the  
262 maximum population ( $N = 10^7$ ), as the replication capacity of  $X$  cells is gradually exhausted  
263  $X$  cells stop dividing, but continue to die, which leads to their eventual extinction. During  
264 the simulation  $p53^{+/-}$  mutations take place, this allows  $Z$  cells to extend their replication  
265 capacity by  $\rho_e$  divisions. When  $Z$  cells exhaust their extended replication capacity, they  
266 become unstable and acquire the  $W$  cell phenotype, which is characterized by a high death  
267 rate  $D$ . Without the acquisition of a  $tmase+$  mutation both the  $Z$  and  $W$  cell populations  
268 eventually go extinct. During this simulation  $tmase+$  mutants do emerge (red line); however,  
269 because they do so at a time when most  $X$  cells have not exhausted their replication capacity  
270 they initially have no fitness advantage and in this simulation go stochastically extinct.  
271 Figure 2B depicts a simulation where a double mutant emerges from the  $Y$  cell population

272 (tmase+ followed by p53<sup>+/-</sup>). The emergence of the double mutant is indicated by the red  
273 dot. Figure 2C plots a simulation where a double mutant emerges from the *W* cell population  
274 (p53<sup>+/-</sup> unstable followed by tmase+; purple dot).

275 Figure 2D plots the probability that the first double mutant emerges from the *Y* cell pop-  
276 ulation (tmase+ first), calculated from those simulations where a double mutation occurred.  
277 The figure includes plots for two different values of the death rate,  $D$ , of *W* cells (p53<sup>+/-</sup>  
278 unstable), and two different values for the replication capacity extension,  $\rho_e$ , of *Z* cells. In  
279 the model the death rate for cells in crisis (*W*) must be greater than one, otherwise cells in  
280 crisis can go on dividing indefinitely, with ever shortening telomeres and increasing levels of  
281 chromosome instability (a scenario which is not biologically feasible). For this reason, we  
282 simulated two values for the death rate of *W* cells:  $D = 1.05$ , which represents a case where  
283 the death and birth rate are nearly balanced; and  $D = 2$  (twice the size of the birth rate pa-  
284 rameter  $r$ ). Figure 2D also demonstrates that the size of the replication capacity extension,  
285  $\rho_e$ , is crucial in determining the likelihood of the sequence of mutations (tmase+ followed by  
286 p53<sup>+/-</sup> vs. p53<sup>+/-</sup> followed by tmase+). Indeed, as shown in the simulations, a difference  
287 of only 10 cell division ( $\rho_e = 20$  vs.  $\rho_e = 30$ ) can dramatically alter the likelihood of the  
288 sequence of mutations. There is limited data for the value of  $\rho_e$ , although a range of 20–30  
289 PD has been suggested [28, 29]. The actual value of  $\rho_e$  however, is in an all likelihood cell  
290 type dependent, and influenced by multiple factors, such as the level of telomere restriction  
291 factor two (TRF2) expression [3]. Note that for  $D = 1.05$  (red lines), as  $d$  increases, there  
292 is a switch from p53<sup>+/-</sup> followed by tmase+ as the most likely sequence of mutations giving  
293 origin to the first double mutant, to tmase+ followed by p53<sup>+/-</sup>. This behavior is explained  
294 by the fact that lower values of  $d$  allow for more *Z* cell divisions, which also result in higher  
295 *W* cell populations. The higher the number of *Z* and *W* cells, the more likely that the first  
296 double mutant originates in a p53<sup>+/-</sup> cell.

297 Figure 2E plots the probability of a double mutation occurring for different values of  $\rho_e$   
298 and  $D$ . We note that the outcomes are sensitive to the value of  $\rho_e$  (red vs. blue lines). One

299 interesting result is that when there is no cell death of stable cells ( $d = 0$ ), the probability  
300 of a double mutation occurring is basically zero. The reason why this occurs is that  $\text{tmase}+$   
301 mutations are only advantageous against a background of cells that senesce and die. Other-  
302 wise  $Y$  cells have a neutral fitness and are thus likely to go stochastically extinct. In a setting  
303 where  $X$  cells die,  $Y$  mutants might emerge and linger on until the time when they become  
304 advantageous, but without  $X$  cell death,  $Y$  cells never gain an advantage. Here and in all  
305 figures, we performed simulations up to a maximum time  $T = 1000$  (relative to a division  
306 rate parameter  $r = 1$ ). This value of  $T$  was sufficient for every simulation with  $d > 0$  to  
307 result in either complete population extinction, or the emergence of a double mutant. This  
308 would not have been the case however, if we simulated very small positive values of  $d$ . To  
309 understand why, we note that if the simulated time was unbounded ( $T = \infty$ ), the probability  
310 of a second mutation occurring would be monotonically decreasing for  $d > 0$ . Indeed, as  $d$   
311 gets smaller, the average number of  $X$  cell divisions increases, and thus so does the proba-  
312 bility of a double mutant emerging. However, as  $d$  decreases, the expected time of arrival of  
313 the first double mutant goes up (Figure 2F). In fact, by the arguments in the discussion of  
314 Figure 2F, it is straightforward to see that as  $d$  goes to zero, the expected arrival time of the  
315 first double mutant goes to infinity. Hence, for any finite time interval  $[0, T]$ , the probability  
316 of a second mutation emerging will not be monotonic for positive  $d$ , but instead will have  
317 the same basic shape as the plot in Figure 2E.

318 Figure 2F plots the time when a double mutation first emerges. In the simulations the  
319 mean arrival time of the first double mutant is not very sensitive to either the replication  
320 capacity extension,  $\rho_e$ , or the death rate of unstable cells,  $D$ . The reason why is that mutants  
321 are not selected for until  $X$  cells start becoming senescent. As soon as the number of  $X$   
322 cells starts declining (the time of which is unaffected by  $\rho_e$  and  $D$ ), pre-existing mutant  
323 clones gain an advantage, which can lead to the arrival of the first double mutant. In the  
324 simulations as  $d > 0$  increases, there are on average fewer cell divisions, which means that  
325 the probability of a double mutation occurring goes down (Figure 2E). Higher  $d$  values also

326 cause  $X$  cells to become senescent sooner, which on average decreases the time at which  
327 mutants start to become advantageous. For this reason, even if higher values of  $d$  decrease  
328 the probability of a double mutation occurring, in those instances where a double mutation  
329 does happen, larger  $d$  values reduce the expected arrival time of the first double mutant  
330 (Figure 2F).

331 Figures 3A and 3B plot the probability that the first double mutant emerges from the  
332 unstable cell population ( $W$ ), calculated from those instances where a double mutation  
333 occurred. As expected, decreasing the death rate of unstable cells increases the probability  
334 that the first double mutation originates in a  $W$  cell (dashed vs. solid lines). Also, increasing  
335  $\rho_e$  by just 10 PD, from  $\rho_e = 20$  to  $\rho_e = 30$ , significantly raises the likelihood that the first  
336 double mutant originates from an unstable cell. The dependence on  $d$  can be more nuanced.  
337 This is best exemplified by the curve corresponding to  $\rho_e = 30$  and  $D = 1.05$  (Figure 3B, solid  
338 line). While Figure 2D shows that the probability that the first double mutant originates  
339 in a  $p53^{+/-}$  cell goes down as  $d$  increases, it is clear from Figure 3 that the likelihood that  
340 the the first double mutant emerges from the  $W$  cell population can be a non-monotonic  
341 function of  $d$ . The reason behind this behavior is that smaller values of  $d$  result in more  
342  $Z$  and  $W$  cell divisions, making the emergence of the first double mutant from a  $p53^{+/-}$   
343 cell more likely; however, when the value of  $d$  is sufficiently small, the number of  $Z$  cells  
344 divisions can be large enough, so that the first double mutant can more often originate in  $Z$   
345 cells directly, i.e., before  $p53^{+/-}$  cells enter crisis.

346 Figures 3C and 3D present histograms depicting the distribution for the time of the first  
347 emergence of a double mutant, originating from two different sequence of events:  $tmase+$   
348 followed by  $p53^{+/-}$ , or  $p53^{+/-}$  followed  $tmase+$ . The figure underscores the importance of  
349 the parameter  $\rho_e$  in determining the likelihood of the sequence of events. One interesting  
350 result is that, independent of the value of  $\rho_e$ , the expected time for the emergence of the first  
351 double mutant is smaller when the second mutation originates in the  $Y$  cell population. In  
352 other words, the average time of emergence of the first double mutation is faster when the

353 first mutation is  $tmase+$ .

354 Figure 4A plots the expected number of cells using the stochastic-deterministic thresholds  
355  $M = 2000$  (circles) and  $M = 4000$  (solid lines), for simulations where double mutations did  
356 not occur –for all cell types depicted the normalized error  $\epsilon(M, 2M) < 0.05$  over the time  
357 interval  $I = [0, 1000]$ . Figure 4B plots the distribution of the times when the first double  
358 mutant emerges, using a parameter set that makes the generation of a large number of fully  
359 stochastic independent trials computationally reasonable. This figure compares the results  
360 from a fully stochastic simulation algorithm with the results from an implementation of the  
361 hybrid method. Table 1 shows the average computational run time per trial for different  
362 max population sizes using the fully stochastic and the hybrid algorithm. For a maximum  
363 population size of  $N = 10^7$  the hybrid algorithm is more than 2,200 times faster.

## 364 Discussion

365 Recently we presented a mathematical model with the aim of quantifying the effectiveness of  
366 replicative limits as a tumor suppressor pathway [41]. We also developed a Luria-Delbruck  
367 mutational framework to estimate the probability of escaping replicative limits through a  
368 mutation that activates telomerase [42]. These models assumed that the only constraint to  
369 cell proliferation was set by replicative limits. Here, we extend these results by studying the  
370 population dynamics in a setting where population size is also constrained by a fixed carrying  
371 capacity. We also consider the emergence of two of the most frequent events in tumorigenesis:  
372 Loss of p53 function and telomerase activation. The model has direct applications to an  
373 important telomerase negative mouse model and to p16 deficient human cells. Our work  
374 adds to growing body of literature that investigates mathematically the effects of replicative  
375 limits in cancer at the scale of cell populations (see e.g. [43, 44, 45]).

376 To implement our model we used a hybrid stochastic-deterministic algorithm. The algo-  
377 rithm simultaneously models large populations deterministically, and small populations and  
378 mutations stochastically. It provides good agreement with fully stochastic implementations



379 of the model, and very significant improvements in terms of speed (up to several orders of  
380 magnitude faster). These improvements in performance allows us to use biologically rele-  
381 vant population sizes and mutation rates, circumventing some of the traditional limitations  
382 of fully stochastic methods. The development of hybrid algorithms has received considerable  
383 attention in physical chemistry applications and related fields. These ideas however, have  
384 yet to find widespread use in the field of evolution. The hybrid methodology outlined in this  
385 paper could be easily adapted to model many aspects of tumor evolution, and more broadly,  
386 it can also be applied to a wide range of evolutionary models.

387 In this article we examined the relative frequency of the order of acquisition of the two  
388 mutations as a function of key biological parameters. We found that for any finite time  
389 interval, the probability of a double mutation occurring is a non-monotonic function of the  
390 death rate of stable cells ( $d$ ). However, if we exclude very small values of  $d$ , then increasing  
391 the death rate of stable cells decreases the probability that a double mutation occurs. Our  
392 simulations also revealed that higher death rates of stable cells increase the likelihood that  
393 the first double mutant originates in a telomerase positive cell. The probability that the  
394 first double mutant emerges from an unstable cell has a more complex dependence on  $d$ .  
395 Indeed, depending on the sizes of the replication capacity extension of p53 mutants and  
396 the death rate of unstable cells, the probability that the first double mutation originates in  
397 an unstable cell can peak at intermediate values of  $d$ . We also found that the size of the  
398 replication capacity extension of p53 mutants is crucial in determining the probability of a  
399 double mutant occurring and the likelihood of the sequence of mutations. In particular, we  
400 found that a difference of just ten population doublings in the replication capacity extension  
401 can significantly impact the behavior of the system. Interestingly, the expected arrival time  
402 of the first double mutant is only weakly dependent on the replication capacity extension  
403 and the death rate of unstable cells. Instead it is most influenced by the time at which  
404 the telomerase negative p53 wild-type cell population starts to senesce, since only then do  
405 pre-existing mutants become advantageous.

406 Compared to sarcomas and hematopoietic malignancies, epithelial cancers require a large  
407 number of mutations and genome rearrangements to achieve a malignant state [46]. It has  
408 thus been suggested that a mutator phenotype must take place to account for the con-  
409 stellation of genome abnormalities found in many malignant carcinomas. In this respect,  
410 telomere-based crisis has been identified as a key mutator mechanism driving epithelial car-  
411 cinogenesis in cells that initially lack telomerase [3]. Here we presented a mathematical  
412 model that takes into account replicative limits and examines the dynamics of two muta-  
413 tions central to the entrance and escape from crisis. One important extension to the model  
414 will be the inclusion of mutational events, such as translocations and loss of heterozygosity  
415 (LOH), which occur at increased rates during crisis. In particular, this will require modeling  
416 the population dynamics and possible fitness differences between different types of double  
417 mutants. This analysis will be fundamental to understand quantitatively under which condi-  
418 tions telomere shortening shifts from being a powerful tumor suppressor pathway to a driving  
419 force behind carcinogenesis.

## 420 **Figure legends**

421 **Figure 1.** (A) Each cell has a replication capacity  $\rho \geq 0$ . When a cell with replication  
422 capacity  $\rho > 0$  divides, it produces two daughter cells with replication capacities  $\rho - 1$ . Cells  
423 with replication capacity  $\rho = 0$  become senescent and stop dividing. (B) Different path-  
424 ways by which cells can acquire two cancer associated mutations: Activation of telomerase  
425 (tmase+) and inactivation of one p53 allele (p53<sup>+/-</sup>). The mutation rate for acquiring the  
426 p53<sup>+/-</sup> phenotype is set to  $\mu_1 = 10^{-7}$  (loss of one tumor suppressor allele). The mutation  
427 rate to activate telomerase is set to  $\mu_2 = 10^{-9}$  (point mutation). p53<sup>+/-</sup> cells have a defective  
428 DNA damage response, which allows them to undergo extra rounds of cell division beyond  
429 the normal replication capacity  $\rho$ . In p53<sup>+/-</sup> cells telomere length continues to decrease  
430 with each cell division, eventually leading to telomere crisis. Crisis is characterized by criti-  
431 cally short telomeres causing chromosome breakage–fusion–bridge cycles and widespread cell

432 death. Cells in crisis are referred in the diagram as  $p53^{+/-}$  unstable cells. Telomerase activa-  
433 tion allows cells to escape replication limits, making them capable of dividing an unlimited  
434 number of times.

435 **Figure 2.** Times series of a simulation when: (A) a double mutation never occurs; (B) the  
436 first mutation emerges from  $Y$  cell population (tmase+ first); and (C), the first mutation  
437 emerges from the  $W$  cell population ( $p53^{+/-}$  first). In each panel, the first emergence of a  
438 double mutation is indicated by a solid dot. In panels A–C,  $\rho_e = 20$ ,  $d = 0.1$ , and,  $D = 1.05$ .  
439 (D) Probability that the first double mutant emerges through the pathway tmase+ first  
440 followed by  $p53^{+/-}$ . Error bars indicate 95% confidence intervals. Blue and red colors  
441 correspond to different values of the replication capacity extension  $\rho_e$ , defined as the number  
442 of extra division that  $p53^{+/-}$  cells can undergo before entering crisis. Solid and dashed lines  
443 indicate different values  $D$  for the cell death of unstable cells (compared to a dimensionless  
444 division rate parameter  $r = 1$ ). The maximum replication capacity of  $X$  cells (tmase-  
445 and  $p53^{+/+}$ ) is set to  $\rho_m = 50$ . (E) Probability of the emergence of a double mutant. (F)  
446 Expected time of the first emergence of a double mutant. Results based on  $10^5 - 10^6$   
447 simulations per data point.

448 **Figure 3.** (A) and (B): Probability that the first double mutant emerges from the population  
449 of unstable ( $W$ ) cells –conditioning over those instances where a double mutation occurred.  
450 Two different death rates of unstable cells are depicted,  $D = 1.05$  (solid lines) and  $D = 2$   
451 (dashed lines). (C) and (D): Distribution of the arrival time of the first double mutant. The  
452 panels correspond to two different values of the replication capacity extension  $\rho_e$ , defined as  
453 the number of extra division that  $p53^{+/-}$  cells can undergo before entering crisis. In (A) and  
454 (C)  $\rho_e = 20$ ; in (B) and (D)  $\rho_e = 30$ . In all panels  $\rho_m = 50$ . In (C) and (D),  $d = 0.1$  and  
455  $D = 1.05$ .

456 **Figure 4.** (A) Expected number of cells using two different thresholds,  $M$ , for the size  
457 that determines the stochastic to deterministic transition. Solid lines  $M = 2000$ ; circles

458  $M = 4000$ . The panel corresponds to simulations where a double mutant did not emerge.  
459 Parameters:  $\rho_m = 50$ ,  $\rho_e = 20$ ,  $d = 0.1$ , and  $D = 1.05$ . (B) Distribution of the arrival time  
460 of the first double mutant for a parameter set that makes the generation of a large number  
461 of fully stochastic independent trials computationally reasonable. Blue: Results from fully  
462 stochastic simulations. Red: Results using the hybrid method. Parameters:  $K = 10^4$ ,  
463  $\mu_1 = 10^{-4}$ ,  $\mu_2 = 10^{-6}$ ,  $\rho_m = 30$ ,  $\rho_e = 15$ ,  $d = 0.1$ , and  $D = 1.05$ .

## 464 References

- 465 [1] Mel Greaves. *Cancer: the evolutionary legacy*. Oxford University Press on Demand,  
466 2001.
- 467 [2] Steven A Frank. *Dynamics of cancer: incidence, inheritance, and evolution*. Princeton  
468 University Press, 2007.
- 469 [3] John Maciejowski and Titia de Lange. Telomeres in cancer: tumour suppression  
470 and genome instability. *Nat Rev Mol Cell Biol*, 18(3):175–186, Mar 2017. doi:  
471 10.1038/nrm.2016.171.
- 472 [4] Ignacio A Rodriguez-Brenes and Dominik Wodarz. Preventing clonal evolutionary pro-  
473 cesses in cancer: Insights from mathematical models. *Proc Natl Acad Sci U S A*, 112  
474 (29):8843–50, Jul 2015. doi: 10.1073/pnas.1501730112.
- 475 [5] A Daniel Gillespie. General method for numerically simulating the stochastic time  
476 evolution of coupled chemical reactions. *Journal of computational physics*, 22, 1976.
- 477 [6] Jerry W Shay and Woodring E Wright. Senescence and immortalization: role  
478 of telomeres and telomerase. *Carcinogenesis*, 26(5):867–74, May 2005. doi:  
479 10.1093/carcin/bgh296.
- 480 [7] L Hayflick. The limited in vitro lifetime of human diploid cell strains. *Exp Cell Res*, 37:  
481 614–36, Mar 1965.

- 482 [8] Koei Chin, Carlos Ortiz de Solorzano, David Knowles, Arthur Jones, William Chou,  
483 Enrique Garcia Rodriguez, Wen-Lin Kuo, Britt-Marie Ljung, Karen Chew, Kenneth  
484 Myambo, Monica Miranda, Sheryl Krig, James Garbe, Martha Stampfer, Paul Yaswen,  
485 Joe W Gray, and Stephen J Lockett. In situ analyses of genome instability in breast  
486 cancer. *Nat Genet*, 36(9):984–8, Sep 2004. doi: 10.1038/ng1409.
- 487 [9] Audrey Petitjean, Ewy Mathe, Shunsuke Kato, Chikashi Ishioka, Sean V Tavtigian,  
488 Pierre Hainaut, and Magali Olivier. Impact of mutant p53 functional properties on  
489 tp53 mutation patterns and tumor phenotype: lessons from recent developments in the  
490 iarc tp53 database. *Hum Mutat*, 28(6):622–9, Jun 2007. doi: 10.1002/humu.20495.
- 491 [10] Jacqueline J L Jacobs and Titia de Lange. Significant role for p16ink4a in p53-  
492 independent telomere-directed senescence. *Curr Biol*, 14(24):2302–8, Dec 2004. doi:  
493 10.1016/j.cub.2004.12.025.
- 494 [11] Manuel Collado, Maria A Blasco, and Manuel Serrano. Cellular senescence in cancer  
495 and aging. *Cell*, 130(2):223–233, 2007.
- 496 [12] M A Blasco, H W Lee, M P Hande, E Samper, P M Lansdorp, R A DePinho, and C W  
497 Greider. Telomere shortening and tumor formation by mouse cells lacking telomerase  
498 rna. *Cell*, 91(1):25–34, Oct 1997.
- 499 [13] R A Greenberg, L Chin, A Femino, K H Lee, G J Gottlieb, R H Singer, C W Grei-  
500 der, and R A DePinho. Short dysfunctional telomeres impair tumorigenesis in the  
501 ink4a(delta2/3) cancer-prone mouse. *Cell*, 97(4):515–25, May 1999.
- 502 [14] Christine M Khoo, Daniel R Carrasco, Marcus W Bosenberg, Ji-Hye Paik, and Ronald A  
503 Depinho. Ink4a/arf tumor suppressor does not modulate the degenerative conditions or  
504 tumor spectrum of the telomerase-deficient mouse. *Proc Natl Acad Sci U S A*, 104(10):  
505 3931–6, Mar 2007. doi: 10.1073/pnas.0700093104.

- 506 [15] Agata Smogorzewska and Titia de Lange. Different telomere damage signaling pathways  
507 in human and mouse cells. *EMBO J*, 21(16):4338–48, Aug 2002.
- 508 [16] S E Artandi, S Chang, S L Lee, S Alson, G J Gottlieb, L Chin, and R A DePinho.  
509 Telomere dysfunction promotes non-reciprocal translocations and epithelial cancers in  
510 mice. *Nature*, 406(6796):641–5, Aug 2000. doi: 10.1038/35020592.
- 511 [17] N W Kim, M A Piatyszek, K R Prowse, C B Harley, M D West, P L Ho, G M Coviello,  
512 W E Wright, S L Weinrich, and J W Shay. Specific association of human telomerase  
513 activity with immortal cells and cancer. *Science*, 266(5193):2011–5, Dec 1994.
- 514 [18] Utz Herbig, Wendy A Jobling, Benjamin PC Chen, David J Chen, and John M Sedivy.  
515 Telomere shortening triggers senescence of human cells through a pathway involving  
516 atm, p53, and p21 cip1, but not p16 ink4a. *Molecular cell*, 14(4):501–513, 2004.
- 517 [19] Charles R Holst, Gerard J Nuovo, Manel Esteller, Karen Chew, Stephen B Baylin,  
518 James G Herman, and Thea D Tlsty. Methylation of p16(ink4a) promoters occurs in  
519 vivo in histologically normal human mammary epithelia. *Cancer Res*, 63(7):1596–601,  
520 Apr 2003.
- 521 [20] S R Romanov, B K Kozakiewicz, C R Holst, M R Stampfer, L M Haupt, and T D Tlsty.  
522 Normal human mammary epithelial cells spontaneously escape senescence and acquire  
523 genomic changes. *Nature*, 409(6820):633–7, Feb 2001. doi: 10.1038/35054579.
- 524 [21] Purificación Feijoo, Mariona Terradas, David Soler, Daniel Domínguez, Laura Tusell,  
525 and Anna Genescà. Breast primary epithelial cells that escape p16-dependent stasis  
526 enter a telomere-driven crisis state. *Breast Cancer Research*, 18(1):7, 2016.
- 527 [22] F W Huang, C M Bielski, M L Rinne, W C Hahn, W R Sellers, F Stegmeier, L A  
528 Garraway, and G V Kryukov. Tert promoter mutations and monoallelic activation of  
529 tert in cancer. *Oncogenesis*, 4:e176, Dec 2015. doi: 10.1038/oncsis.2015.39.

- 530 [23] Franklin W Huang, Eran Hodis, Mary Jue Xu, Gregory V Kryukov, Lynda Chin, and  
531 Levi A Garraway. Highly recurrent tert promoter mutations in human melanoma. *Sci-*  
532 *ence*, 339(6122):957–9, Feb 2013. doi: 10.1126/science.1229259.
- 533 [24] Patrick J Killela, Zachary J Reitman, Yuchen Jiao, Chetan Bettgowda, Nishant  
534 Agrawal, Luis A Diaz, Allan H Friedman, Henry Friedman, Gary L Gallia, Beppino C  
535 Giovanella, et al. Tert promoter mutations occur frequently in gliomas and a subset  
536 of tumors derived from cells with low rates of self-renewal. *Proceedings of the National*  
537 *Academy of Sciences*, 110(15):6021–6026, 2013.
- 538 [25] Jean Charles Nault, Maxime Mallet, Camilla Pilati, Julien Calderaro, Paulette Bioulac-  
539 Sage, Christophe Laurent, Alexis Laurent, Daniel Cherqui, Charles Balabaud, Jes-  
540 sica Zucman-Rossi, and Jessica Zucman Rossi. High frequency of telomerase reverse-  
541 transcriptase promoter somatic mutations in hepatocellular carcinoma and preneoplastic  
542 lesions. *Nat Commun*, 4:2218, 2013. doi: 10.1038/ncomms3218.
- 543 [26] Siân Jones, Wei-Dong Chen, Giovanni Parmigiani, Frank Diehl, Niko Beerenwinkel, Ti-  
544 bor Antal, Arne Traulsen, Martin A Nowak, Christopher Siegel, Victor E Velculescu,  
545 Kenneth W Kinzler, Bert Vogelstein, Joseph Willis, and Sanford D Markowitz. Com-  
546 parative lesion sequencing provides insights into tumor evolution. *Proc Natl Acad Sci*  
547 *U S A*, 105(11):4283–8, Mar 2008. doi: 10.1073/pnas.0712345105.
- 548 [27] Alice H Berger and Pier Paolo Pandolfi. Haplo-insufficiency: a driving force in cancer.  
549 *J Pathol*, 223(2):137–46, Jan 2011. doi: 10.1002/path.2800.
- 550 [28] T M Bryan and R R Reddel. Sv40-induced immortalization of human cells. *Crit Rev*  
551 *Oncog*, 5(4):331–57, 1994.
- 552 [29] Ramiro E Verdun and Jan Karlseder. Replication and protection of telomeres. *Nature*,  
553 447(7147):924–31, Jun 2007. doi: 10.1038/nature05976.
- 554 [30] Natalia L Komarova, Anirvan Sengupta, and Martin A Nowak. Mutation-selection

555 networks of cancer initiation: tumor suppressor genes and chromosomal instability. *J*  
556 *Theor Biol*, 223(4):433–50, Aug 2003.

557 [31] K L Rudolph, M Millard, M W Bosenberg, and R A DePinho. Telomere dysfunction  
558 and evolution of intestinal carcinoma in mice and humans. *Nat Genet*, 28(2):155–9, Jun  
559 2001. doi: 10.1038/88871.

560 [32] I M Shih, W Zhou, S N Goodman, C Lengauer, K W Kinzler, and B Vogelstein. Evidence  
561 that genetic instability occurs at an early stage of colorectal tumorigenesis. *Cancer Res*,  
562 61(3):818–22, Feb 2001.

563 [33] F A Tavassoli and H J Norris. A comparison of the results of long-term follow-up for  
564 atypical intraductal hyperplasia and intraductal hyperplasia of the breast. *Cancer*, 65  
565 (3):518–29, Feb 1990.

566 [34] Judah Folkman. Tumor angiogenesis: therapeutic implications. *New england journal of*  
567 *medicine*, 285(21):1182–1186, 1971.

568 [35] Frank A W Coumans, Guus van Dalum, Markus Beck, and Leon W M M Terstappen.  
569 Filter characteristics influencing circulating tumor cell enrichment from whole blood.  
570 *PLoS One*, 8(4):e61770, 2013. doi: 10.1371/journal.pone.0061770.

571 [36] Michael A Gibson and Jehoshua Bruck. Efficient exact stochastic simulation of chemical  
572 systems with many species and many channels. *The journal of physical chemistry A*,  
573 104(9):1876–1889, 2000.

574 [37] Yang Cao, Daniel T Gillespie, and Linda R Petzold. Efficient step size selection for  
575 the tau-leaping simulation method. *J Chem Phys*, 124(4):044109, Jan 2006. doi:  
576 10.1063/1.2159468.

577 [38] Eric L Haseltine and James B Rawlings. Approximate simulation of coupled fast and  
578 slow reactions for stochastic chemical kinetics. *The Journal of chemical physics*, 117  
579 (15):6959–6969, 2002.



- 580 [39] Howard Salis and Yiannis Kaznessis. Accurate hybrid stochastic simulation of a system  
581 of coupled chemical or biochemical reactions. *The Journal of chemical physics*, 122(5):  
582 054103, 2005.
- 583 [40] Thomas G Kurtz. The relationship between stochastic and deterministic models for  
584 chemical reactions. *The Journal of Chemical Physics*, 57(7):2976–2978, 1972.
- 585 [41] Ignacio A Rodriguez-Brenes, Dominik Wodarz, and Natalia L Komarova. Quantifying  
586 replicative senescence as a tumor suppressor pathway and a target for cancer therapy.  
587 *Sci Rep*, 5:17660, Dec 2015. doi: 10.1038/srep17660.
- 588 [42] Ignacio A Rodriguez-Brenes, Dominik Wodarz, and Natalia L Komarova. Cellular repli-  
589 cation limits in the luria–delbrück mutation model. *Physica D: Nonlinear Phenomena*,  
590 328:44–51, 2016.
- 591 [43] Heiko Enderling, Alexander R A Anderson, Mark A J Chaplain, Afshin Beheshti,  
592 Lynn Hlatky, and Philip Hahnfeldt. Paradoxical dependencies of tumor dormancy  
593 and progression on basic cell kinetics. *Cancer Res*, 69(22):8814–21, Nov 2009. doi:  
594 10.1158/0008-5472.CAN-09-2115.
- 595 [44] Ignacio A Rodriguez-Brenes, Dominik Wodarz, and Natalia L Komarova. Minimizing  
596 the risk of cancer: tissue architecture and cellular replication limits. *J R Soc Interface*,  
597 10(86):20130410, Sep 2013. doi: 10.1098/rsif.2013.0410.
- 598 [45] Ignacio A Rodriguez-Brenes, Natalia L Komarova, and Dominik Wodarz. Cancer-  
599 associated mutations in healthy individuals: assessing the risk of carcinogenesis. *Cancer*  
600 *research*, 74(6):1661–1669, 2014.
- 601 [46] Steven E Artandi and Ronald A DePinho. Telomeres and telomerase in cancer. *Car-*  
602 *cinogenesis*, 31(1):9–18, 2010.

**A**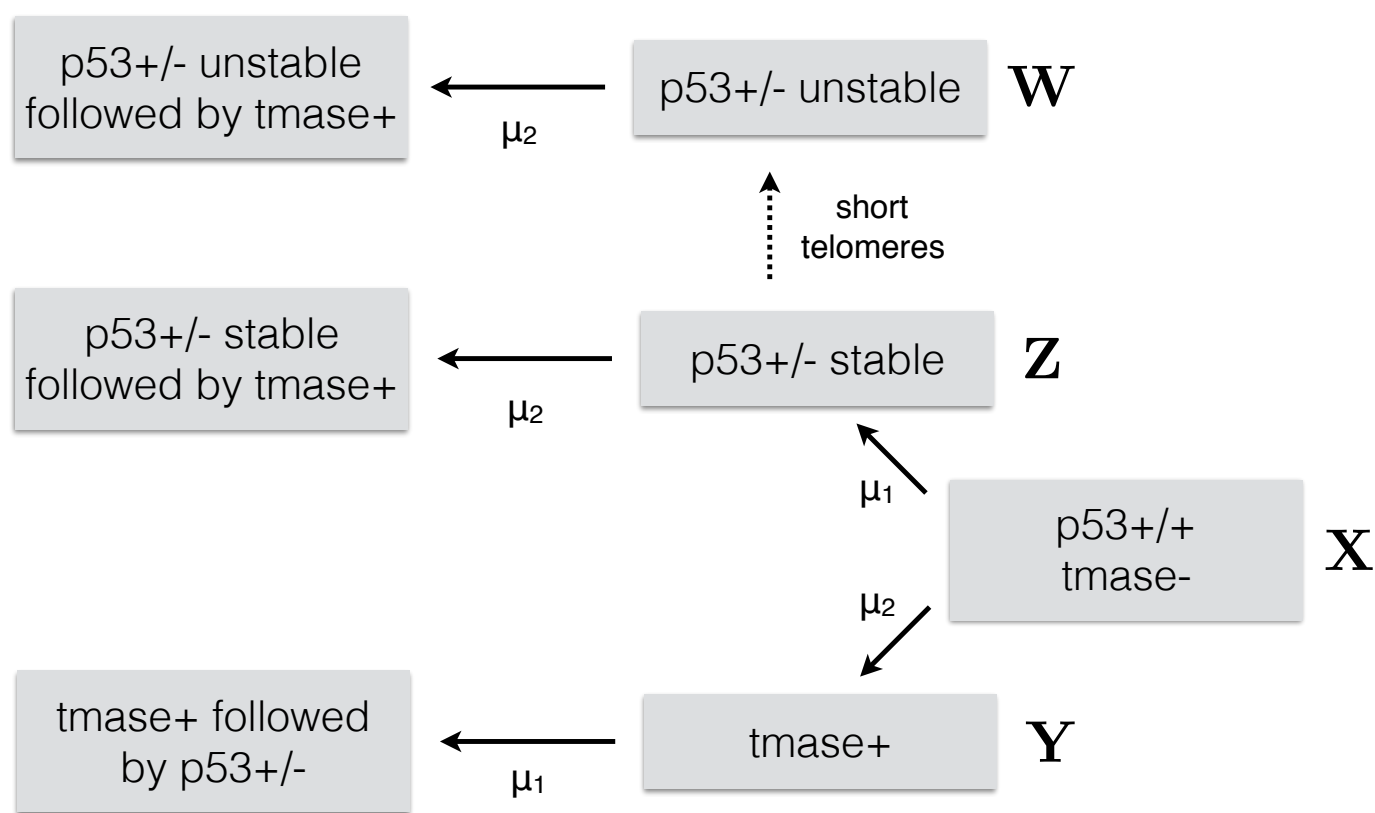**B**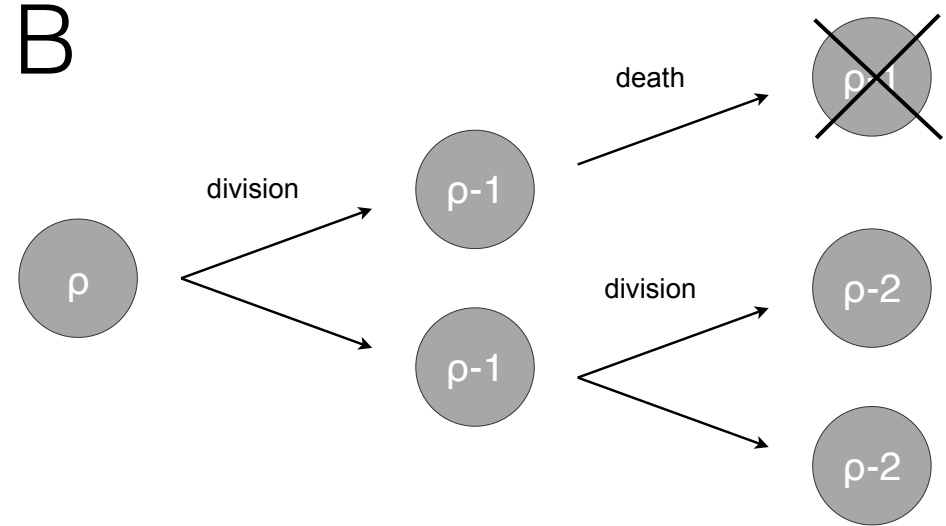

— tmase- p53+/+ — tmase+ — p53+/- stable — p53+/- unstable

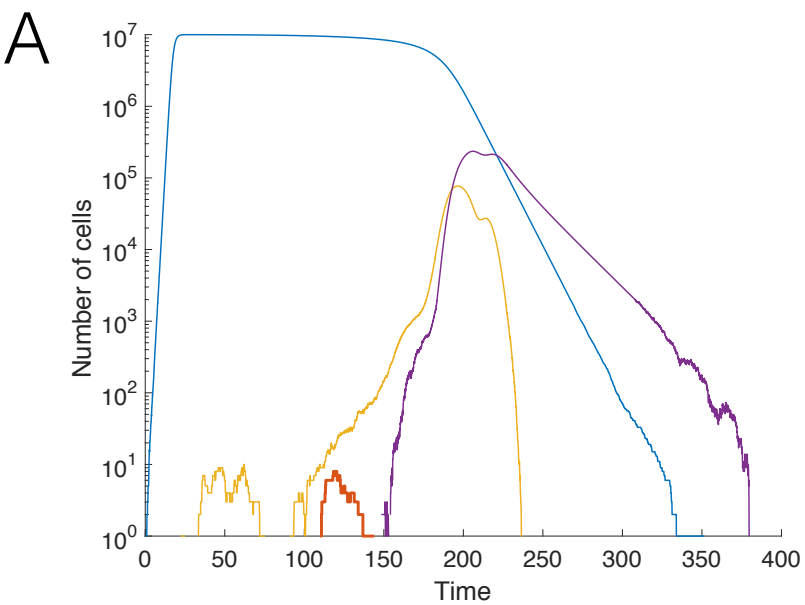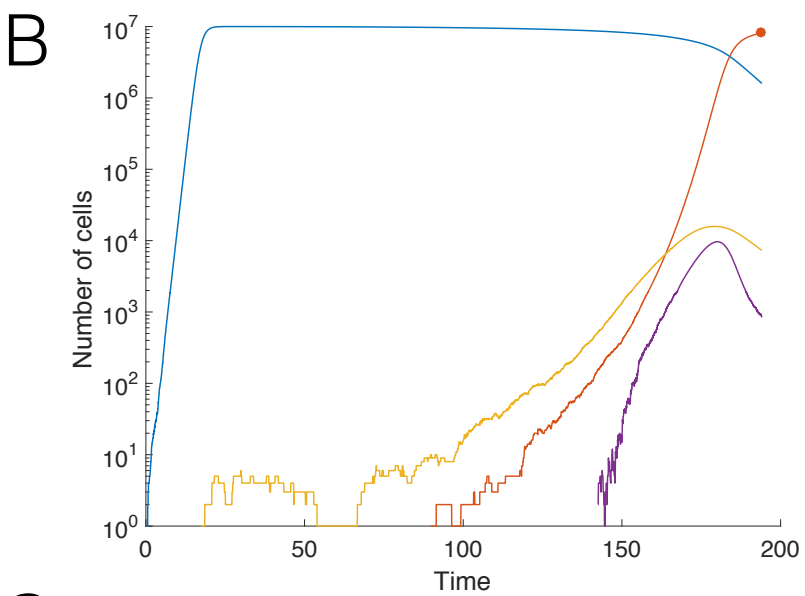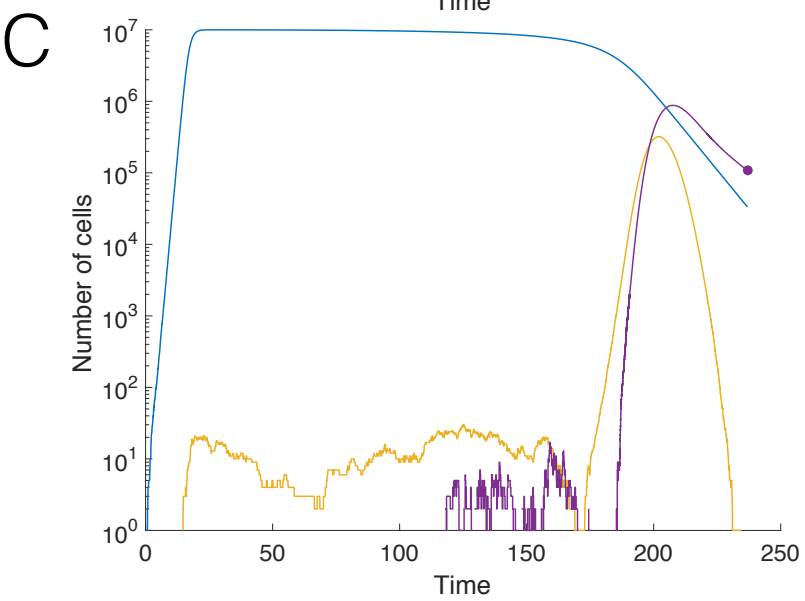

—  $\rho_e = 20$  D=1.05 —  $\rho_e = 20$  D=2 —  $\rho_e = 30$  D=1.05 —  $\rho_e = 30$  D=2

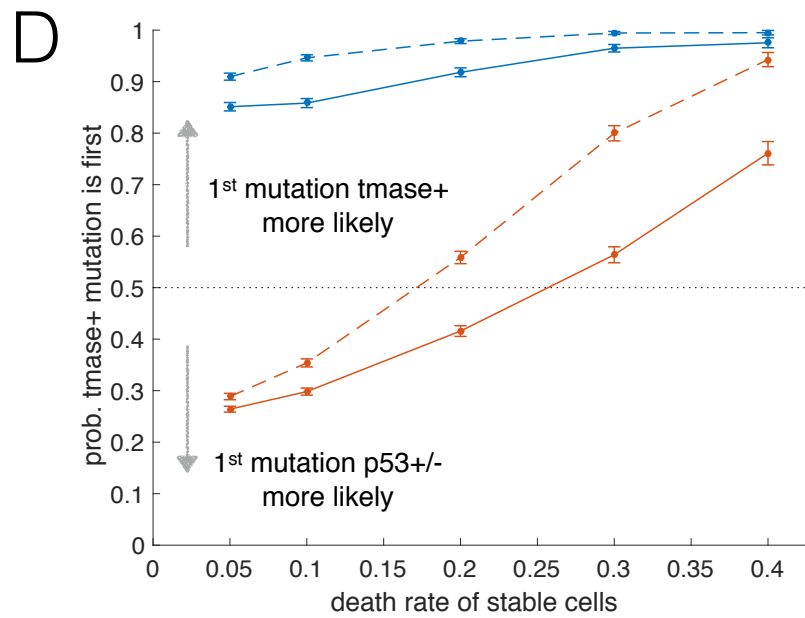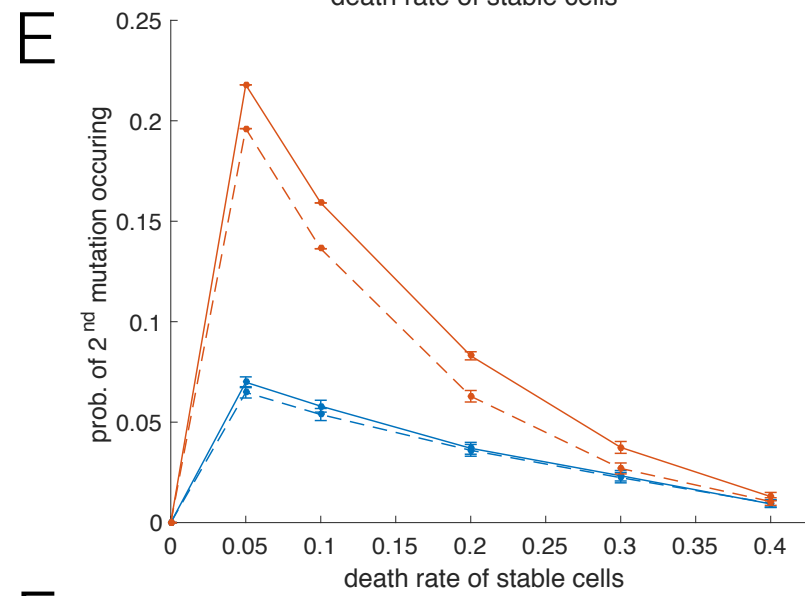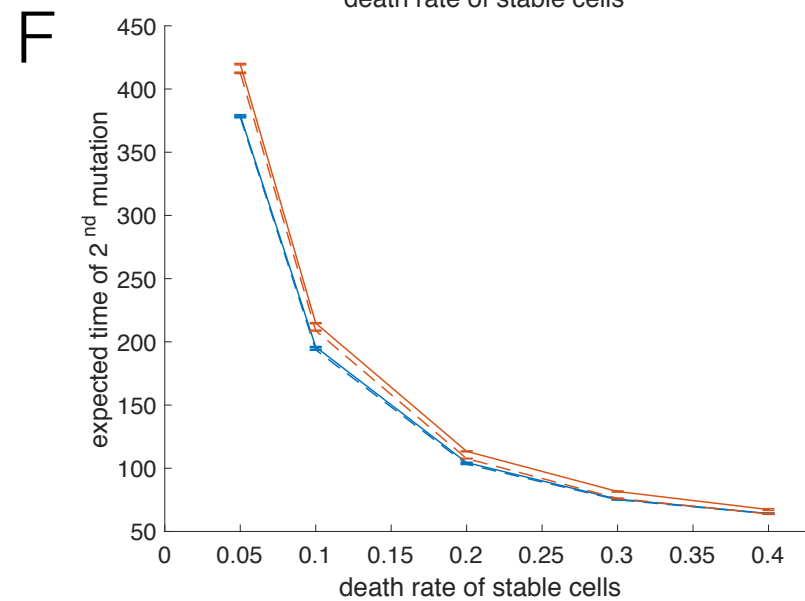

A

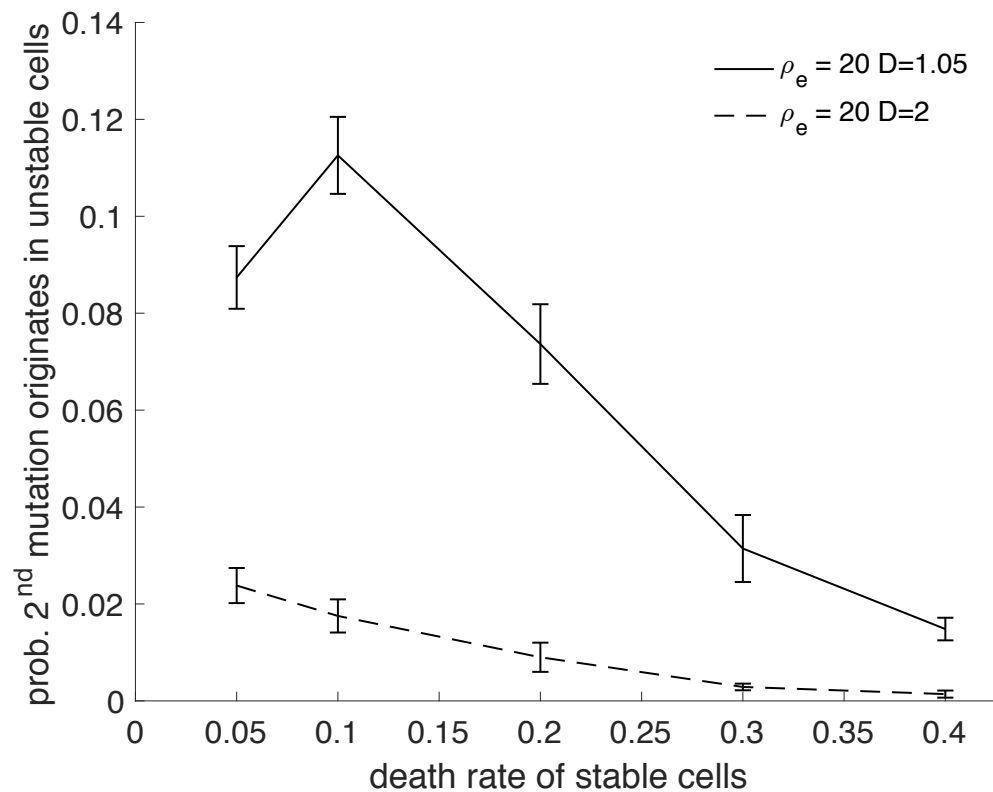

B

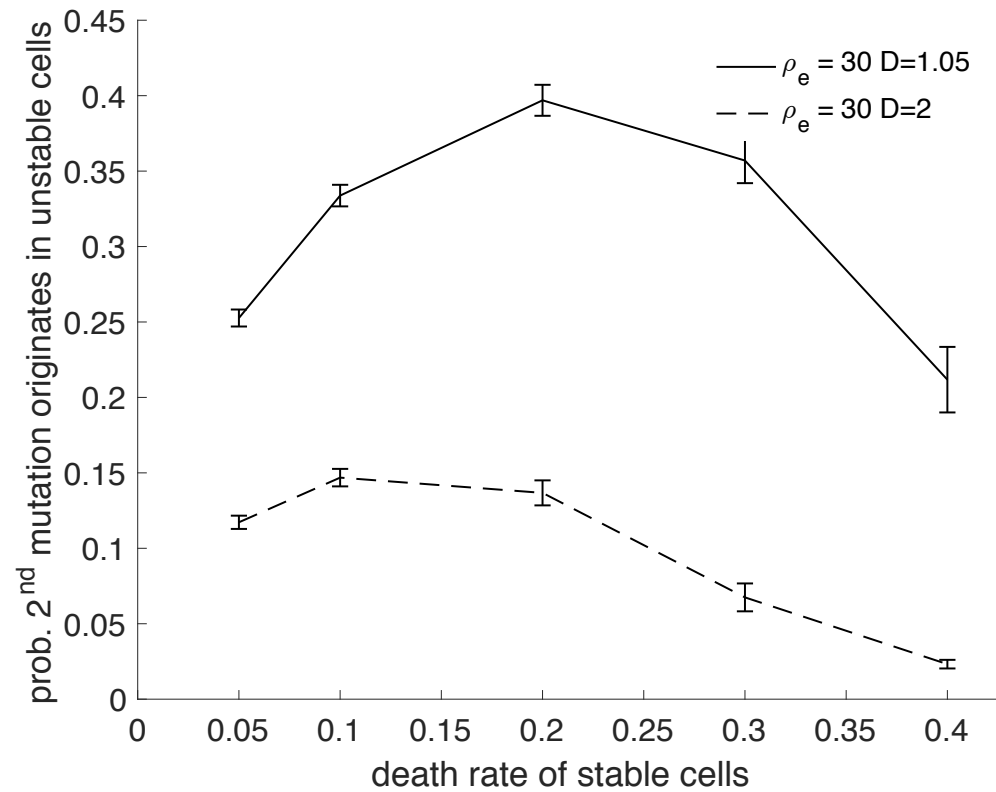

C

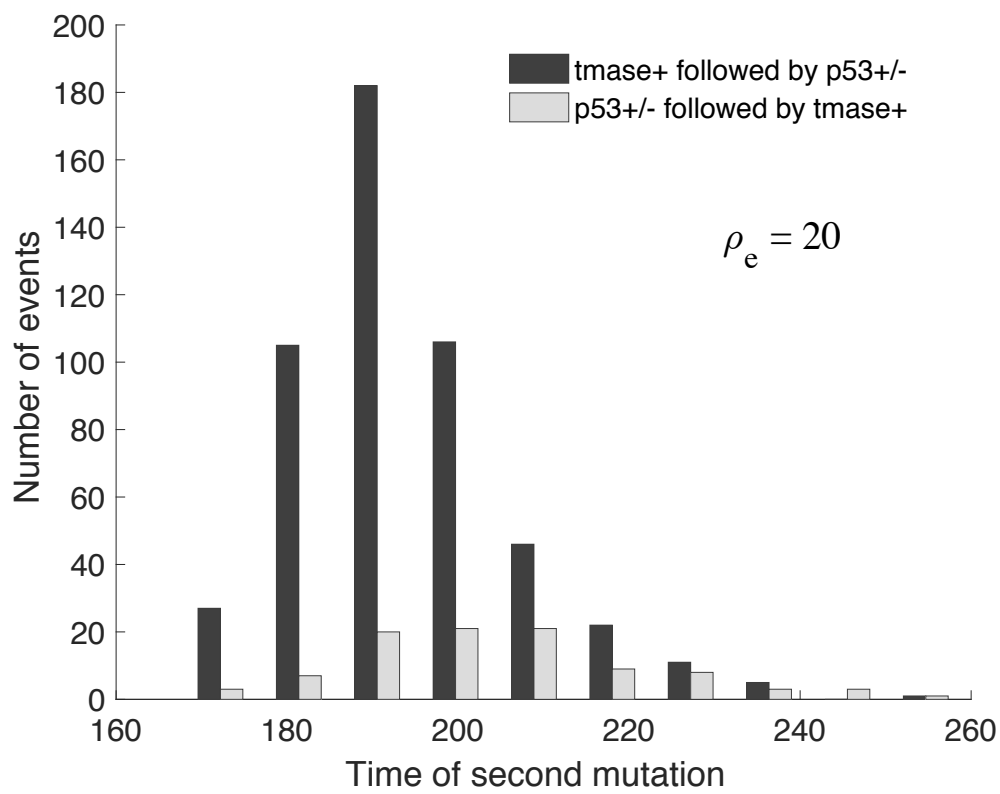

D

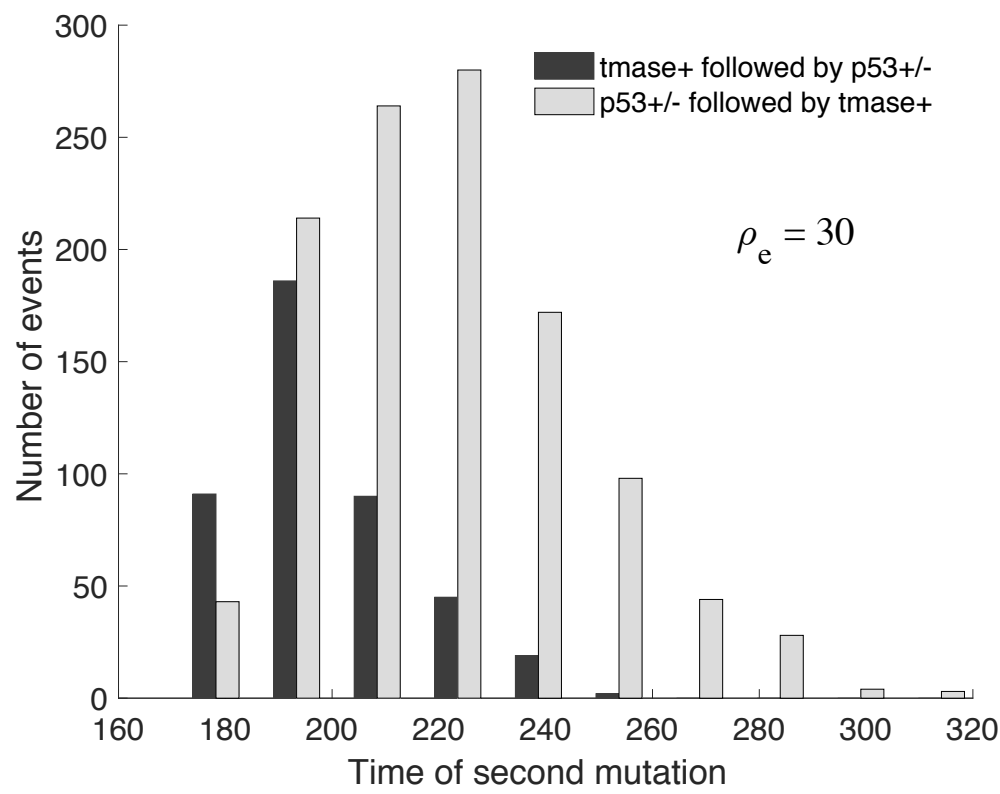

A

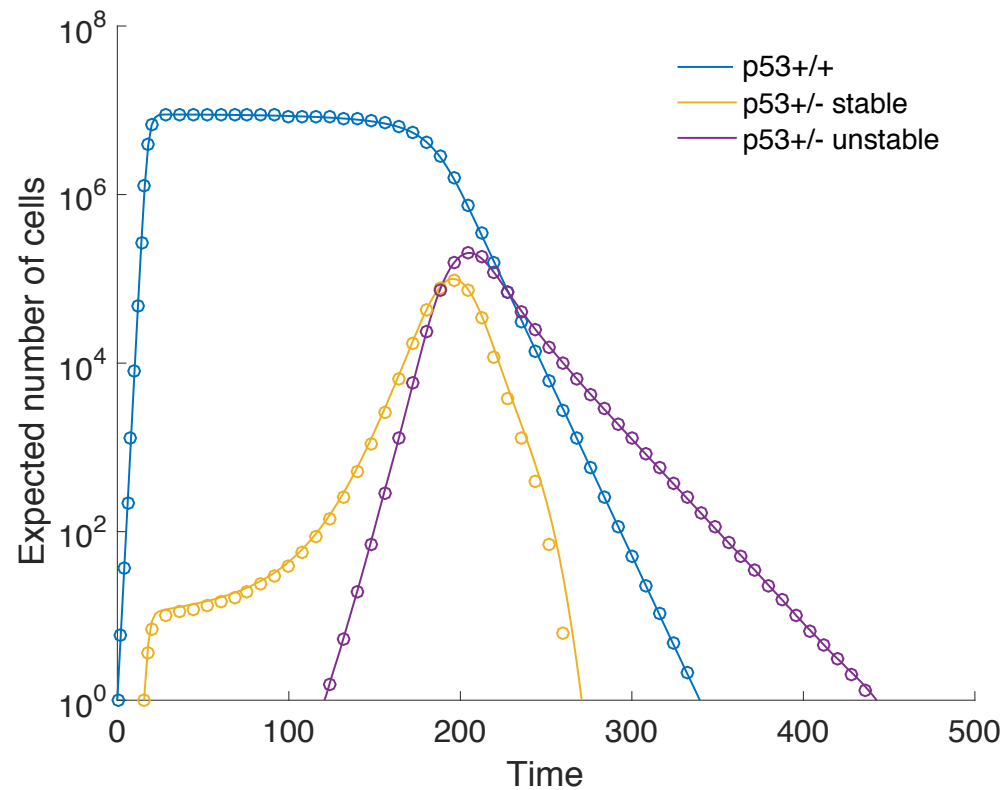

B

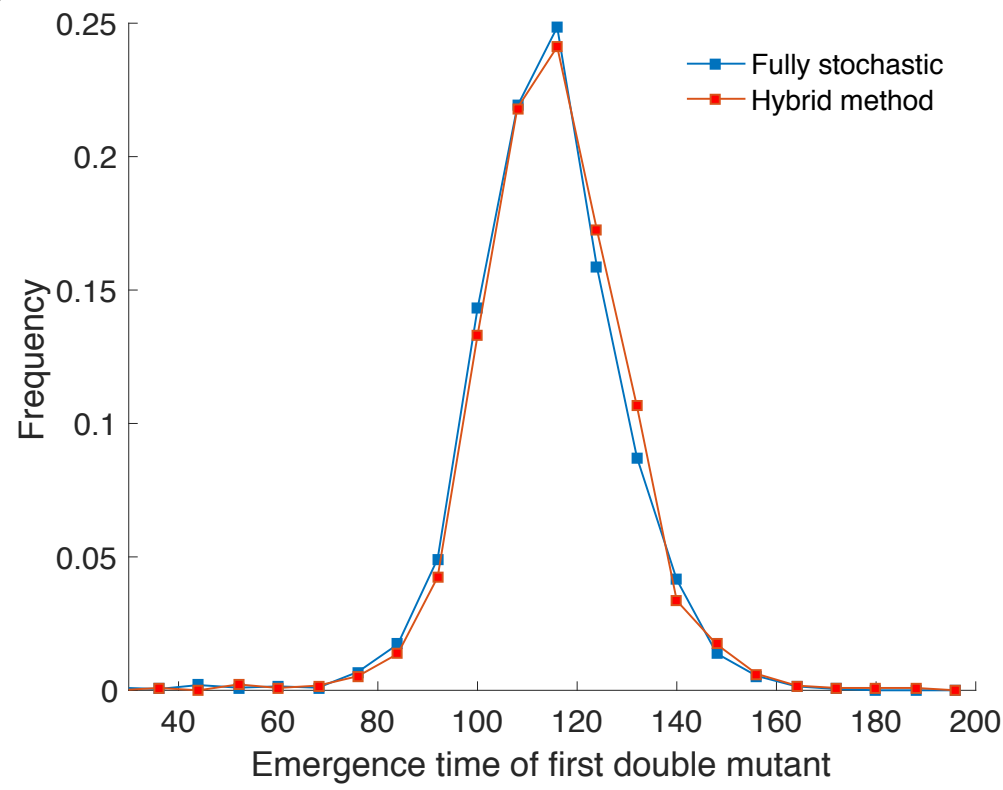

TABLE I. Execution time.

| Max Population Size | Hybrid (s) | Fully Stochastic (s) |
|---------------------|------------|----------------------|
| 10 000              | 0.10       | 0.76                 |
| 100 000             | 0.11       | 6.55                 |
| 1 000 000           | 0.12       | 58.47                |
| 10 000 000          | 0.22       | 503.39               |
